# Supplementary material for: Epigallocatechin-3-gallate targets cancer stem-like cells and enhances 5-fluorouracil chemosensitivity in colorectal cancer
Source: PubMed Central journal article supplement (PMC4941304; doi:10.18632/oncotarget.7567), 2016-02-22
Supplement: oncotarget-07-16158-s001.pdf [file oncotarget-07-16158-s001.pdf]

# Epigallocatechin-3-gallate targets cancer stem-like cells to enhance 5-fluorouracil chemosensitivity in colorectal cancer

## Supplementary Materials

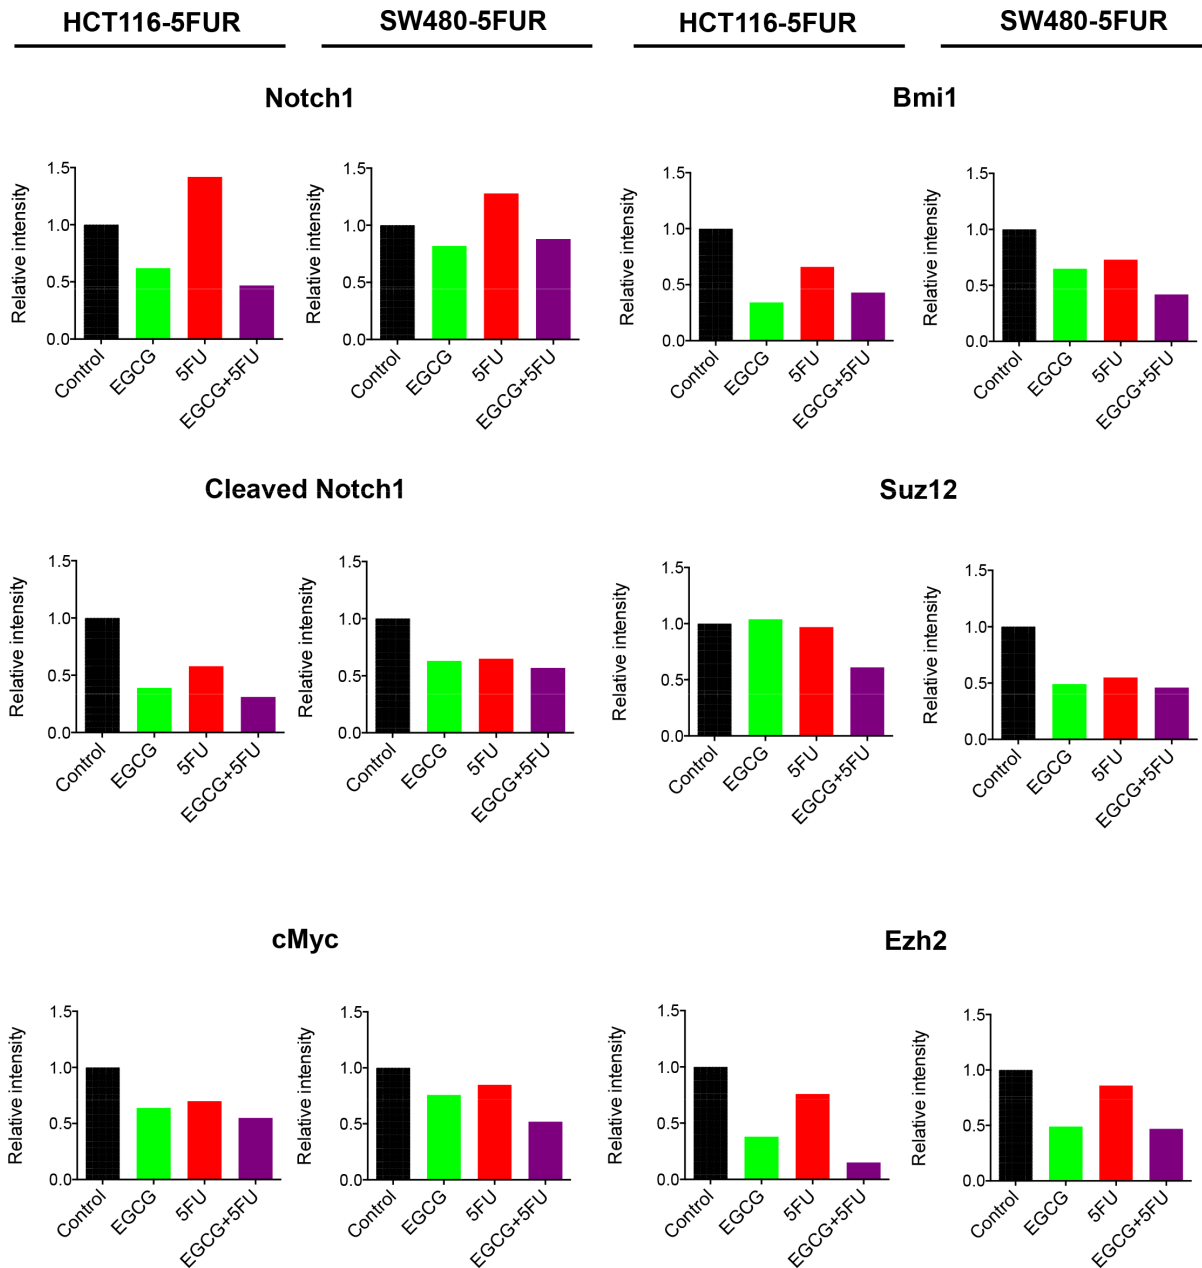

**Supplementary Figure S1: Quantitative densitometry of the protein expression of Notch1, Cleaved Notch1, cMyc, Bmi1, Suz12 and Ezh2 in HCT116 and SW480-5FU cell lines treated with EGCG and/or 5FU. All measurements were represented as ratio between target protein/ $\beta$ -actin and control is normalized to 1.**

**Supplementary Table S1: Primer sequences for gene expression assays**

| <b>Primers</b> | <b>Sequences</b>          |
|----------------|---------------------------|
| Oct4 (F)       | ACATCAAAGCTCTGCAGAAAGAACT |
| Oct4 (R)       | CTGAATACCTTCCCAAATAGAACCC |
| Nanog (F)      | CCGAAGAATAGCAATGGTGTGACG  |
| Nanog (R)      | AGGAGAATTTGGCTGGAAGTGC    |
| GAPDH (F)      | ACCCAGACTGTGGATGG         |
| GAPDH (R)      | CAGTGAGCTTCCCGTTCAG       |

**Supplementary Table S2: Antibodies used and their manufacturer's**

| <b>Manufacturer</b> | <b>Antibody</b> |
|---------------------|-----------------|
| Ezh2                | Cell Signaling  |
| Bmi1                | Cell Signaling  |
| Suz12               | Cell Signaling  |
| CD44                | Abcam           |
| Notch-1             | Cell Signaling  |
| Cleaved Notch-1     | Cell Signaling  |
| cMyc                | BD Pharmingen   |
| $\beta$ -actin      | Sigma           |
